# Supplementary material for: The Cardiometabolic Index: A Novel Predictor of Insulin Resistance and Adverse Reproductive Outcomes in Polycystic Ovary Syndrome
Source: Research Square preprint supplement (doi:10.21203/rs.3.rs-8643615/v1), 2026-02-19
Supplement: Supplementary file 1 [file e40f02be711d1f9e05f4a310.docx]

| **Variables** | **n (%)** | **OR (95%CI)** | **P** | **P for interaction** |
| --- | --- | --- | --- | --- |
| All patients | 944 (100.00) | 1.78 (1.52 ~ 2.09) | <.001 |  |
| Age |  |  |  | 0.945 |
| <30 years | 658 (69.70) | 1.76 (1.44 ~ 2.15) | <.001 |  |
| ＞30 years | 286 (30.30) | 2.17 (1.56 ~ 3.01) | <.001 |  |
| BMI |  |  |  | 0.051 |
| Normal weight | 507 (53.71) | 1.86 (1.42 ~ 2.43) | <.001 |  |
| Overweight | 276 (29.24) | 2.02 (1.49 ~ 2.74) | <.001 |  |
| Obesity | 161 (17.06) | 1.16 (0.80 ~ 1.68) | 0.429 |  |
| Hypertention |  |  |  | 0.753 |
| No | 568 (60.17) | 1.84 (1.47 ~ 2.30) | <.001 |  |
| Yes | 376 (39.83) | 1.67 (1.31 ~ 2.13) | <.001 |  |
| HA |  |  |  | **0.006** |
| No | 411 (43.54) | 2.19 (1.64 ~ 2.92) | <.001 |  |
| Yes | 533 (56.46) | 1.56 (1.28 ~ 1.91) | <.001 |  |
| Age,Current smoking, FAI, LH, FSH, LHR, E2, SHBG, FT, AMH, ApoA1, AST, ALT, LDH, TBIL, PHO, CYSC were adjusted. In the subgroup analyses, the model is not adjusted for the stratification variable itself | | | | |

**Supplement Table 1** Subgroup Analysis for IR (QUICKI)
